# Supplementary material for: In Silico Study of Anti-Insomnia Mechanism for Suanzaoren Prescription
Source: Front Pharmacol. 2019 Aug 22;10:925. doi: 10.3389/fphar.2019.00925 (PMC6713715; doi:10.3389/fphar.2019.00925)
Supplement: Supplementary file 1 [file Table_1.xlsx]

## Sheet: Suanzaoren
Uniprot_ID	Gene_Symbol	Description
P22303	ACHE	acetylcholinesterase (Cartwright blood group)
P35348	ADRA1A	adrenoceptor alpha 1A
P35368	ADRA1B	adrenoceptor alpha 1B
P08913	ADRA2A	adrenoceptor alpha 2A
P18825	ADRA2C	adrenoceptor alpha 2C
P07550	ADRB2	adrenoceptor beta 2
O60218	AKR1B10	aldo-keto reductase family 1 member B10
P02768	ALB	albumin
P27695	APEX1	apurinic/apyrimidinic endodeoxyribonuclease 1
Q8IUX4	APOBEC3F	apolipoprotein B mRNA editing enzyme catalytic subunit 3F
P05067	APP	amyloid beta precursor protein
P10275	AR	androgen receptor
Q9NRY4	ARHGAP35	Rho GTPase activating protein 35
P00915	CA1	carbonic anhydrase 1
O43570	CA12	carbonic anhydrase 12
Q9ULX7	CA14	carbonic anhydrase 14
P00918	CA2	carbonic anhydrase 2
P07451	CA3	carbonic anhydrase 3
P22748	CA4	carbonic anhydrase 4
P35218	CA5A	carbonic anhydrase 5A
Q9Y2D0	CA5B	carbonic anhydrase 5B
P23280	CA6	carbonic anhydrase 6
P43166	CA7	carbonic anhydrase 7
Q16790	CA9	carbonic anhydrase 9
P0DP25	CALM1	calmodulin 1
P20248	CCNA2	cyclin A2
P24941	CDK2	cyclin dependent kinase 2
P11229	CHRM1	cholinergic receptor muscarinic 1
P27487	DPP4	dipeptidyl peptidase 4
P14416	DRD2	dopamine receptor D2
Q96KQ7	EHMT2	euchromatic histone lysine methyltransferase 2
P03372	ESR1	estrogen receptor 1
Q92731	ESR2	estrogen receptor 2
P00451	F8	coagulation factor VIII
P10253	GAA	glucosidase alpha, acid
P04062	GBA	glucosylceramidase beta
P08151	GLI1	GLI family zinc finger 1
O75496	GMNN	geminin, DNA replication inhibitor
P63092	GNAS	GNAS complex locus
Q8TDU6	GPBAR1	G protein-coupled bile acid receptor 1
P49841	GSK3B	glycogen synthase kinase 3 beta
Q8TDS4	HCAR2	hydroxycarboxylic acid receptor 2
Q969S8	HDAC10	histone deacetylase 10
P46098	HTR3A	5-hydroxytryptamine receptor 3A
P34969	HTR7	5-hydroxytryptamine receptor 7
Q12794	HYAL1	hyaluronoglucosaminidase 1
O75874	IDH1	isocitrate dehydrogenase (NADP(+)) 1, cytosolic
B2RXH2	KDM4E	lysine demethylase 4E
P21397	MAOA	monoamine oxidase A
P27338	MAOB	monoamine oxidase B
Q15788	NCOA1	nuclear receptor coactivator 1
P35228	NOS2	nitric oxide synthase 2
Q13133	NR1H3	nuclear receptor subfamily 1 group H member 3
P04150	NR3C1	nuclear receptor subfamily 3 group C member 1
P41143	OPRD1	opioid receptor delta 1
P35372	OPRM1	opioid receptor mu 1
P06401	PGR	progesterone receptor
P11309	PIM1	Pim-1 proto-oncogene, serine/threonine kinase
P00749	PLAU	plasminogen activator, urokinase
P06746	POLB	DNA polymerase beta
Q9Y253	POLH	DNA polymerase eta
Q9UBT6	POLK	DNA polymerase kappa
P05771	PRKCB	protein kinase C beta
P07477	PRSS1	serine protease 1
P23219	PTGS1	prostaglandin-endoperoxide synthase 1
P35354	PTGS2	prostaglandin-endoperoxide synthase 2
Q03431	PTH1R	parathyroid hormone 1 receptor
P18031	PTPN1	protein tyrosine phosphatase, non-receptor type 1
Q8WZA2	RAPGEF4	Rap guanine nucleotide exchange factor 4
P49798	RGS4	regulator of G protein signaling 4
P19793	RXRA	retinoid X receptor alpha
Q14524	SCN5A	sodium voltage-gated channel alpha subunit 5
P23975	SLC6A2	solute carrier family 6 member 2
Q01959	SLC6A3	solute carrier family 6 member 3
P31645	SLC6A4	solute carrier family 6 member 4
Q9Y6L6	SLCO1B1	solute carrier organic anion transporter family member 1B1
Q9NPD5	SLCO1B3	solute carrier organic anion transporter family member 1B3
P11388	TOP2A	DNA topoisomerase II alpha
Q9UBT2	UBA2	ubiquitin like modifier activating enzyme 2
P22309	UGT1A1	UDP glucuronosyltransferase family 1 member A1

## Sheet: Zhimu
Uniprot_ID	Gene Symbol	Description
P22760	AADAC	arylacetamide deacetylase
P08183	ABCB1	ATP binding cassette subfamily B member 1
P33527	ABCC1	ATP binding cassette subfamily C member 1
Q9UNQ0	ABCG2	ATP binding cassette subfamily G member 2 (Junior blood group)
P22303	ACHE	acetylcholinesterase (Cartwright blood group)
P00325	ADH1B	alcohol dehydrogenase 1B (class I), beta polypeptide
P00326	ADH1C	alcohol dehydrogenase 1C (class I), gamma polypeptide
P35348	ADRA1A	adrenoceptor alpha 1A
P35368	ADRA1B	adrenoceptor alpha 1B
P08913	ADRA2A	adrenoceptor alpha 2A
P18825	ADRA2C	adrenoceptor alpha 2C
P08588	ADRB1	adrenoceptor beta 1
P07550	ADRB2	adrenoceptor beta 2
P35869	AHR	aryl hydrocarbon receptor
P15121	AKR1B1	aldo-keto reductase family 1 member B
P42330	AKR1C3	aldo-keto reductase family 1 member C3
P00352	ALDH1A1	aldehyde dehydrogenase 1 family member A1
P16050	ALOX15	arachidonate 15-lipoxygenase
O15296	ALOX15B	arachidonate 15-lipoxygenase, type B
P09917	ALOX5	arachidonate 5-lipoxygenase
P04745	AMY1A	amylase, alpha 1A (salivary)
P27695	APEX1	apurinic/apyrimidinic endodeoxyribonuclease 1
P05067	APP	amyloid beta precursor protein
O43315	AQP9	aquaporin 9
P10275	AR	androgen receptor
P06576	ATP5F1B	ATP synthase F1 subunit beta
Q96GD4	AURKB	aurora kinase B
P56817	BACE1	beta-secretase 1
Q9UIF8	BAZ2B	bromodomain adjacent to zinc finger domain 2B
P06276	BCHE	butyrylcholinesterase
P10415	BCL2	BCL2, apoptosis regulator
O43570	CA12	carbonic anhydrase 12
P00918	CA2	carbonic anhydrase 2
P0DP25	CALM1	calmodulin 1
P04040	CAT	catalase
P83916	CBX1	chromobox 1
P20248	CCNA2	cyclin A2
O95067	CCNB2	cyclin B2
P25942	CD40	CD40 molecule
P06493	CDK1	cyclin dependent kinase 1
P24941	CDK2	cyclin dependent kinase 2
Q15078	CDK5R1	cyclin dependent kinase 5 regulatory subunit 1
Q00534	CDK6	cyclin dependent kinase 6
O95813	CER1	cerberus 1, DAN family BMP antagonist
O15335	CHAD	chondroadherin
P11229	CHRM1	cholinergic receptor muscarinic 1
Q92793	CREBBP	CREB binding protein
P19784	CSNK2A2	casein kinase 2 alpha 2
Q9GZU7	CTDSP1	CTD small phosphatase 1
P11511	CYP19A1	cytochrome P450 family 19 subfamily A member 1
P04798	CYP1A1	cytochrome P450 family 1 subfamily A member 1
P05177	CYP1A2	cytochrome P450 family 1 subfamily A member 2
Q16678	CYP1B1	cytochrome P450 family 1 subfamily B member 1
Q16696	CYP2A13	cytochrome P450 family 2 subfamily A member 13
P11509	CYP2A6	cytochrome P450 family 2 subfamily A member 6
P33261	CYP2C19	cytochrome P450 family 2 subfamily C member 19
P11712	CYP2C9	cytochrome P450 family 2 subfamily C member 9
P08684	CYP3A4	cytochrome P450 family 3 subfamily A member 4
Q9HB55	CYP3A43	cytochrome P450 family 3 subfamily A member 43
P14920	DAO	D-amino acid oxidase
Q10586	DBP	D-box binding PAR bZIP transcription factor
Q99489	DDO	D-aspartate oxidase
O75907	DGAT1	diacylglycerol O-acyltransferase 1
Q5HYR2	DMRTC1	DMRT like family C1
P27487	DPP4	dipeptidyl peptidase 4
P00533	EGFR	epidermal growth factor receptor
Q9NT22	EMILIN3	elastin microfibril interfacer 3
P11678	EPX	eosinophil peroxidase
P03372	ESR1	estrogen receptor 1
Q92731	ESR2	estrogen receptor 2
P11474	ESRRA	estrogen related receptor alpha
O95718	ESRRB	estrogen related receptor beta
P13726	F3	coagulation factor III, tissue factor
P00451	F8	coagulation factor VIII
P25445	FAS	Fas cell surface death receptor
P48023	FASLG	Fas ligand
P49327	FASN	fatty acid synthase
P39748	FEN1	flap structure-specific endonuclease 1
P36888	FLT3	fms related tyrosine kinase 3
Q11130	FUT7	fucosyltransferase 7
P10253	GAA	glucosidase alpha, acid
P04062	GBA	glucosylceramidase beta
O60383	GDF9	growth differentiation factor 9
P55789	GFER	growth factor, augmenter of liver regeneration
Q04760	GLO1	glyoxalase I
P43220	GLP1R	glucagon like peptide 1 receptor
Q8TDU6	GPBAR1	G protein-coupled bile acid receptor 1
P42262	GRIA2	glutamate ionotropic receptor AMPA type subunit 2
Q7Z429	GRINA	glutamate ionotropic receptor NMDA type subunit associated protein 1
P49841	GSK3B	glycogen synthase kinase 3 beta
Q9P0R6	GSKIP	GSK3B interacting protein
P09488	GSTM1	glutathione S-transferase mu 1
P28161	GSTM2	glutathione S-transferase mu 2
P09211	GSTP1	glutathione S-transferase pi 1
Q8TDS4	HCAR2	hydroxycarboxylic acid receptor 2
P49019	HCAR3	hydroxycarboxylic acid receptor 3
P06865	HEXA	hexosaminidase subunit alpha
Q16665	HIF1A	hypoxia inducible factor 1 alpha subunit
P09601	HMOX1	heme oxygenase 1
P15428	HPGD	15-hydroxyprostaglandin dehydrogenase
P23327	HRC	histidine rich calcium binding protein
Q9Y5N1	HRH3	histamine receptor H3
Q9H3N8	HRH4	histamine receptor H4
P14061	HSD17B1	hydroxysteroid 17-beta dehydrogenase 1
Q99714	HSD17B10	hydroxysteroid 17-beta dehydrogenase 10
P37059	HSD17B2	hydroxysteroid 17-beta dehydrogenase 2
P04792	HSPB1	heat shock protein family B (small) member 1
P34969	HTR7	5-hydroxytryptamine receptor 7
O75874	IDH1	isocitrate dehydrogenase (NADP(+)) 1, cytosolic
P01584	IL1B	interleukin 1 beta
P06213	INSR	insulin receptor
P35568	IRS1	insulin receptor substrate 1
P05412	JUN	Jun proto-oncogene, AP-1 transcription factor subunit
Q92830	KAT2A	lysine acetyltransferase 2A
Q12809	KCNH2	potassium voltage-gated channel subfamily H member 2
O75164	KDM4A	lysine demethylase 4A
B2RXH2	KDM4E	lysine demethylase 4E
P35968	KDR	kinase insert domain receptor
P10721	KIT	KIT proto-oncogene receptor tyrosine kinase
Q03164	KMT2A	lysine methyltransferase 2A
Q9Y468	L3MBTL1	L3MBTL1, histone methyl-lysine binding protein
P17931	LGALS3	galectin 3
P38571	LIPA	lipase A, lysosomal acid type
P02545	LMNA	lamin A/C
P06858	LPL	lipoprotein lipase
Q9Y5Y7	LYVE1	lymphatic vessel endothelial hyaluronan receptor 1
P61626	LYZ	lysozyme
P21397	MAOA	monoamine oxidase A
P27338	MAOB	monoamine oxidase B
P53779	MAPK10	mitogen-activated protein kinase 10
P45983	MAPK8	mitogen-activated protein kinase 8
P10636	MAPT	microtubule associated protein tau
P03956	MMP1	matrix metallopeptidase 1
P29372	MPG	N-methylpurine DNA glycosylase
P42345	MTOR	mechanistic target of rapamycin kinase
Q15788	NCOA1	nuclear receptor coactivator 1
Q9Y3R4	NEU2	neuraminidase 2
Q16236	NFE2L2	nuclear factor, erythroid 2 like 2
P19838	NFKB1	nuclear factor kappa B subunit 1
Q9Y2I1	NISCH	nischarin
P01857	None	None
P35228	NOS2	nitric oxide synthase 2
Q9NPH5	NOX4	NADPH oxidase 4
P04150	NR3C1	nuclear receptor subfamily 3 group C member 1
P08235	NR3C2	nuclear receptor subfamily 3 group C member 2
P41143	OPRD1	opioid receptor delta 1
P35372	OPRM1	opioid receptor mu 1
O76074	PDE5A	phosphodiesterase 5A
P02776	PF4	platelet factor 4
P06401	PGR	progesterone receptor
P11309	PIM1	Pim-1 proto-oncogene, serine/threonine kinase
Q13526	PIN1	peptidylprolyl cis/trans isomerase, NIMA-interacting 1
Q13563	PKD2	polycystin 2, transient receptor potential cation channel
P14618	PKM	pyruvate kinase M1/2
P47712	PLA2G4A	phospholipase A2 group IVA
P00749	PLAU	plasminogen activator, urokinase
P06746	POLB	DNA polymerase beta
P54098	POLG	DNA polymerase gamma, catalytic subunit
Q9UBT6	POLK	DNA polymerase kappa
Q07869	PPARA	peroxisome proliferator activated receptor alpha
Q03181	PPARD	peroxisome proliferator activated receptor delta
P37231	PPARG	peroxisome proliferator activated receptor gamma
Q08209	PPP3CA	protein phosphatase 3 catalytic subunit alpha
P48147	PREP	prolyl endopeptidase
Q9UNN8	PROCR	protein C receptor
P07477	PRSS1	serine protease 1
P07602	PSAP	prosaposin
P23219	PTGS1	prostaglandin-endoperoxide synthase 1
P35354	PTGS2	prostaglandin-endoperoxide synthase 2
P21246	PTN	pleiotrophin
O75365	PTP4A3	protein tyrosine phosphatase type IVA, member 3
Q12923	PTPN13	protein tyrosine phosphatase, non-receptor type 13
Q13332	PTPRS	protein tyrosine phosphatase, receptor type S
Q9H0H5	RACGAP1	Rac GTPase activating protein 1
Q9Y2V3	RAX	retina and anterior neural fold homeobox
Q04206	RELA	RELA proto-oncogene, NF-kB subunit
Q9Y6N7	ROBO1	roundabout guidance receptor 1
P51449	RORC	RAR related orphan receptor C
P19793	RXRA	retinoid X receptor alpha
P28702	RXRB	retinoid X receptor beta
Q9UBE0	SAE1	SUMO1 activating enzyme subunit 1
Q14524	SCN5A	sodium voltage-gated channel alpha subunit 5
P16581	SELE	selectin E
P01008	SERPINC1	serpin family C member 1
P05546	SERPIND1	serpin family D member 1
Q9UHI7	SLC23A1	solute carrier family 23 member 1
Q96FL8	SLC47A1	solute carrier family 47 member 1
P23975	SLC6A2	solute carrier family 6 member 2
Q01959	SLC6A3	solute carrier family 6 member 3
P31645	SLC6A4	solute carrier family 6 member 4
P30825	SLC7A1	solute carrier family 7 member 1
Q9Y6L6	SLCO1B1	solute carrier organic anion transporter family member 1B1
Q9NPD5	SLCO1B3	solute carrier organic anion transporter family member 1B3
O94956	SLCO2B1	solute carrier organic anion transporter family member 2B1
O15524	SOCS1	suppressor of cytokine signaling 1
P00441	SOD1	superoxide dismutase 1
Q3SY56	SP6	Sp6 transcription factor
P18405	SRD5A1	steroid 5 alpha-reductase 1
Q9NYW4	TAS2R5	taste 2 receptor member 5
Q9NUW8	TDP1	tyrosyl-DNA phosphodiesterase 1
P48307	TFPI2	tissue factor pathway inhibitor 2
O15455	TLR3	toll like receptor 3
P01375	TNF	tumor necrosis factor
O00220	TNFRSF10A	TNF receptor superfamily member 10a
O14763	TNFRSF10B	TNF receptor superfamily member 10b
Q9Y6Q6	TNFRSF11A	TNF receptor superfamily member 11a
O00300	TNFRSF11B	TNF receptor superfamily member 11b
P19438	TNFRSF1A	TNF receptor superfamily member 1A
P20333	TNFRSF1B	TNF receptor superfamily member 1B
P50591	TNFSF10	TNF superfamily member 10
O14788	TNFSF11	TNF superfamily member 11
Q9Y275	TNFSF13B	TNF superfamily member 13b
P11388	TOP2A	DNA topoisomerase II alpha
P04637	TP53	tumor protein p53
Q9HCF6	TRPM3	transient receptor potential cation channel subfamily M member 3
P14679	TYR	tyrosinase
P22309	UGT1A1	UDP glucuronosyltransferase family 1 member A1
P22310	UGT1A4	UDP glucuronosyltransferase family 1 member A4
Q9Y4X1	UGT2A1	UDP glucuronosyltransferase family 2 member A1 complex locus
P16662	UGT2B7	UDP glucuronosyltransferase family 2 member B7
O94782	USP1	ubiquitin specific peptidase 1
P19320	VCAM1	vascular cell adhesion molecule 1
P11473	VDR	vitamin D receptor
P15692	VEGFA	vascular endothelial growth factor A
O43915	VEGFD	vascular endothelial growth factor D
P04004	VTN	vitronectin
P47989	XDH	xanthine dehydrogenase
P13010	XRCC5	X-ray repair cross complementing 5

## Sheet: Fuling
Uniprot_ID	Gene Symbol	Description
Q9UNQ0	ABCG2	ATP binding cassette subfamily G member 2 (Junior blood group)
P22303	ACHE	acetylcholinesterase (Cartwright blood group)
O60488	ACSL4	acyl-CoA synthetase long chain family member 4
P00325	ADH1B	alcohol dehydrogenase 1B (class I), beta polypeptide
P00326	ADH1C	alcohol dehydrogenase 1C (class I), gamma polypeptide
P35368	ADRA1B	adrenoceptor alpha 1B
O43865	AHCYL1	adenosylhomocysteinase like 1
P15121	AKR1B1	aldo-keto reductase family 1 member B
P31749	AKT1	AKT serine/threonine kinase 1
P00352	ALDH1A1	aldehyde dehydrogenase 1 family member A1
P51649	ALDH5A1	aldehyde dehydrogenase 5 family member A1
P16050	ALOX15	arachidonate 15-lipoxygenase
P09917	ALOX5	arachidonate 5-lipoxygenase
P04745	AMY1A	amylase, alpha 1A (salivary)
P04746	AMY2A	amylase, alpha 2A (pancreatic)
P27695	APEX1	apurinic/apyrimidinic endodeoxyribonuclease 1
P10275	AR	androgen receptor
Q9NRY4	ARHGAP35	Rho GTPase activating protein 35
O14965	AURKA	aurora kinase A
P56817	BACE1	beta-secretase 1
Q92934	BAD	BCL2 associated agonist of cell death
Q9UIF8	BAZ2B	bromodomain adjacent to zinc finger domain 2B
P06276	BCHE	butyrylcholinesterase
P10415	BCL2	BCL2, apoptosis regulator
P15056	BRAF	B-Raf proto-oncogene, serine/threonine kinase
P00915	CA1	carbonic anhydrase 1
O43570	CA12	carbonic anhydrase 12
Q8N1Q1	CA13	carbonic anhydrase 13
Q9ULX7	CA14	carbonic anhydrase 14
P00918	CA2	carbonic anhydrase 2
P07451	CA3	carbonic anhydrase 3
P22748	CA4	carbonic anhydrase 4
P35218	CA5A	carbonic anhydrase 5A
Q9Y2D0	CA5B	carbonic anhydrase 5B
P23280	CA6	carbonic anhydrase 6
P43166	CA7	carbonic anhydrase 7
Q16790	CA9	carbonic anhydrase 9
P42574	CASP3	caspase 3
P55211	CASP9	caspase 9
Q13951	CBFB	core-binding factor beta subunit
P83916	CBX1	chromobox 1
P20248	CCNA2	cyclin A2
P25942	CD40	CD40 molecule
P33681	CD80	CD80 molecule
P42081	CD86	CD86 molecule
P06493	CDK1	cyclin dependent kinase 1
P24941	CDK2	cyclin dependent kinase 2
P38936	CDKN1A	cyclin dependent kinase inhibitor 1A
P11229	CHRM1	cholinergic receptor muscarinic 1
P02452	COL1A1	collagen type I alpha 1 chain
P07339	CTSD	cathepsin D
P07711	CTSL	cathepsin L
P10145	CXCL8	C-X-C motif chemokine ligand 8
P11511	CYP19A1	cytochrome P450 family 19 subfamily A member 1
Q9UBM7	DHCR7	7-dehydrocholesterol reductase
Q08426	EHHADH	enoyl-CoA hydratase and 3-hydroxyacyl CoA dehydrogenase
P03372	ESR1	estrogen receptor 1
Q92731	ESR2	estrogen receptor 2
P12104	FABP2	fatty acid binding protein 2
P05413	FABP3	fatty acid binding protein 3
P15090	FABP4	fatty acid binding protein 4
Q01469	FABP5	fatty acid binding protein 5
P25445	FAS	Fas cell surface death receptor
P48023	FASLG	Fas ligand
P49327	FASN	fatty acid synthase
O14842	FFAR1	free fatty acid receptor 1
P10253	GAA	glucosidase alpha, acid
Q99259	GAD1	glutamate decarboxylase 1
P43220	GLP1R	glucagon like peptide 1 receptor
O75496	GMNN	geminin, DNA replication inhibitor
P42262	GRIA2	glutamate ionotropic receptor AMPA type subunit 2
P49841	GSK3B	glycogen synthase kinase 3 beta
Q969S8	HDAC10	histone deacetylase 10
P15428	HPGD	15-hydroxyprostaglandin dehydrogenase
P08238	HSP90AB1	heat shock protein 90 alpha family class B member 1
P34969	HTR7	5-hydroxytryptamine receptor 7
P42858	HTT	huntingtin
P08069	IGF1R	insulin like growth factor 1 receptor
O14920	IKBKB	inhibitor of nuclear factor kappa B kinase subunit beta
P60568	IL2	interleukin 2
Q9NPF7	IL23A	interleukin 23 subunit alpha
P01589	IL2RA	interleukin 2 receptor subunit alpha
P05231	IL6	interleukin 6
P40189	IL6ST	interleukin 6 signal transducer
Q08881	ITK	IL2 inducible T cell kinase
P52333	JAK3	Janus kinase 3
Q92830	KAT2A	lysine acetyltransferase 2A
O95069	KCNK2	potassium two pore domain channel subfamily K member 2
B2RXH2	KDM4E	lysine demethylase 4E
Q03164	KMT2A	lysine methyltransferase 2A
Q9Y468	L3MBTL1	L3MBTL1, histone methyl-lysine binding protein
P06239	LCK	LCK proto-oncogene, Src family tyrosine kinase
P02545	LMNA	lamin A/C
P61626	LYZ	lysozyme
P21397	MAOA	monoamine oxidase A
P27338	MAOB	monoamine oxidase B
P11137	MAP2	microtubule associated protein 2
Q02750	MAP2K1	mitogen-activated protein kinase kinase 1
P28482	MAPK1	mitogen-activated protein kinase 1
Q16539	MAPK14	mitogen-activated protein kinase 14
P27361	MAPK3	mitogen-activated protein kinase 3
P45983	MAPK8	mitogen-activated protein kinase 8
P49137	MAPKAPK2	mitogen-activated protein kinase-activated protein kinase 2
P10636	MAPT	microtubule associated protein tau
P08581	MET	MET proto-oncogene, receptor tyrosine kinase
P03956	MMP1	matrix metallopeptidase 1
P08253	MMP2	matrix metallopeptidase 2
P08254	MMP3	matrix metallopeptidase 3
P14780	MMP9	matrix metallopeptidase 9
Q15788	NCOA1	nuclear receptor coactivator 1
Q16236	NFE2L2	nuclear factor, erythroid 2 like 2
P19838	NFKB1	nuclear factor kappa B subunit 1
P01857	None	None
P35228	NOS2	nitric oxide synthase 2
Q96RI1	NR1H4	nuclear receptor subfamily 1 group H member 4
P04150	NR3C1	nuclear receptor subfamily 3 group C member 1
P08235	NR3C2	nuclear receptor subfamily 3 group C member 2
Q13177	PAK2	p21 (RAC1) activated kinase 2
P49585	PCYT1A	phosphate cytidylyltransferase 1, choline, alpha
Q15118	PDK1	pyruvate dehydrogenase kinase 1
P06401	PGR	progesterone receptor
P42336	PIK3CA	phosphatidylinositol-4,5-bisphosphate 3-kinase catalytic subunit alpha
O00329	PIK3CD	phosphatidylinositol-4,5-bisphosphate 3-kinase catalytic subunit delta
P48736	PIK3CG	phosphatidylinositol-4,5-bisphosphate 3-kinase catalytic subunit gamma
P11309	PIM1	Pim-1 proto-oncogene, serine/threonine kinase
P14555	PLA2G2A	phospholipase A2 group IIA
Q6P1J6	PLB1	phospholipase B1
P06746	POLB	DNA polymerase beta
Q9UNA4	POLI	DNA polymerase iota
Q07869	PPARA	peroxisome proliferator activated receptor alpha
Q03181	PPARD	peroxisome proliferator activated receptor delta
P37231	PPARG	peroxisome proliferator activated receptor gamma
P17252	PRKCA	protein kinase C alpha
P07477	PRSS1	serine protease 1
Q9NRG1	PRTFDC1	phosphoribosyl transferase domain containing 1
P28074	PSMB5	proteasome subunit beta 5
P23219	PTGS1	prostaglandin-endoperoxide synthase 1
P35354	PTGS2	prostaglandin-endoperoxide synthase 2
Q05397	PTK2	protein tyrosine kinase 2
P04049	RAF1	Raf-1 proto-oncogene, serine/threonine kinase
O95398	RAPGEF3	Rap guanine nucleotide exchange factor 3
P46063	RECQL	RecQ like helicase
P07998	RNASE1	ribonuclease A family member 1, pancreatic
Q13464	ROCK1	Rho associated coiled-coil containing protein kinase 1
P51449	RORC	RAR related orphan receptor C
P19793	RXRA	retinoid X receptor alpha
Q14524	SCN5A	sodium voltage-gated channel alpha subunit 5
P16581	SELE	selectin E
P14151	SELL	selectin L
P16109	SELP	selectin P
O00141	SGK1	serum/glucocorticoid regulated kinase 1
Q9NSA0	SLC22A11	solute carrier family 22 member 11
Q4U2R8	SLC22A6	solute carrier family 22 member 6
Q8TCC7	SLC22A8	solute carrier family 22 member 8
P23975	SLC6A2	solute carrier family 6 member 2
Q9Y6L6	SLCO1B1	solute carrier organic anion transporter family member 1B1
Q9NPD5	SLCO1B3	solute carrier organic anion transporter family member 1B3
O94956	SLCO2B1	solute carrier organic anion transporter family member 2B1
P43405	SYK	spleen associated tyrosine kinase
Q13148	TARDBP	TAR DNA binding protein
Q9NUW8	TDP1	tyrosyl-DNA phosphodiesterase 1
P10828	THRB	thyroid hormone receptor beta
O60603	TLR2	toll like receptor 2
P01375	TNF	tumor necrosis factor
O00220	TNFRSF10A	TNF receptor superfamily member 10a
O14763	TNFRSF10B	TNF receptor superfamily member 10b
Q9Y6Q6	TNFRSF11A	TNF receptor superfamily member 11a
O00300	TNFRSF11B	TNF receptor superfamily member 11b
P19438	TNFRSF1A	TNF receptor superfamily member 1A
P20333	TNFRSF1B	TNF receptor superfamily member 1B
P50591	TNFSF10	TNF superfamily member 10
O14788	TNFSF11	TNF superfamily member 11
Q9Y275	TNFSF13B	TNF superfamily member 13b
P51580	TPMT	thiopurine S-methyltransferase
O75762	TRPA1	transient receptor potential cation channel subfamily A member 1
Q99816	TSG101	tumor susceptibility 101
P16473	TSHR	thyroid stimulating hormone receptor
P22309	UGT1A1	UDP glucuronosyltransferase family 1 member A1
Q9HAW8	UGT1A10	UDP glucuronosyltransferase family 1 member A10
P35503	UGT1A3	UDP glucuronosyltransferase family 1 member A3
Q9HAW9	UGT1A8	UDP glucuronosyltransferase family 1 member A8
O94782	USP1	ubiquitin specific peptidase 1
P11473	VDR	vitamin D receptor
P47989	XDH	xanthine dehydrogenase

## Sheet: Chuanxiong
Uniprot_ID	Gene Symbol	Description
P80404	ABAT	4-aminobutyrate aminotransferase
P22303	ACHE	acetylcholinesterase (Cartwright blood group)
P33121	ACSL1	acyl-CoA synthetase long chain family member 1
O60488	ACSL4	acyl-CoA synthetase long chain family member 4
P00325	ADH1B	alcohol dehydrogenase 1B (class I), beta polypeptide
P00326	ADH1C	alcohol dehydrogenase 1C (class I), gamma polypeptide
P29274	ADORA2A	adenosine A2a receptor
P35348	ADRA1A	adrenoceptor alpha 1A
P35368	ADRA1B	adrenoceptor alpha 1B
P08913	ADRA2A	adrenoceptor alpha 2A
P18825	ADRA2C	adrenoceptor alpha 2C
P08588	ADRB1	adrenoceptor beta 1
P07550	ADRB2	adrenoceptor beta 2
P15121	AKR1B1	aldo-keto reductase family 1 member B
O60218	AKR1B10	aldo-keto reductase family 1 member B10
P42330	AKR1C3	aldo-keto reductase family 1 member C3
P13716	ALAD	aminolevulinate dehydratase
P00352	ALDH1A1	aldehyde dehydrogenase 1 family member A1
P05091	ALDH2	aldehyde dehydrogenase 2 family member
P51649	ALDH5A1	aldehyde dehydrogenase 5 family member A1
P16050	ALOX15	arachidonate 15-lipoxygenase
P09917	ALOX5	arachidonate 5-lipoxygenase
P04746	AMY2A	amylase, alpha 2A (pancreatic)
Q16853	AOC3	amine oxidase, copper containing 3
P27695	APEX1	apurinic/apyrimidinic endodeoxyribonuclease 1
P05067	APP	amyloid beta precursor protein
P10275	AR	androgen receptor
P78540	ARG2	arginase 2
Q9NRY4	ARHGAP35	Rho GTPase activating protein 35
P15289	ARSA	arylsulfatase A
Q96QE3	ATAD5	ATPase family, AAA domain containing 5
Q07812	BAX	BCL2 associated X, apoptosis regulator
Q9UIF8	BAZ2B	bromodomain adjacent to zinc finger domain 2B
P06276	BCHE	butyrylcholinesterase
P10415	BCL2	BCL2, apoptosis regulator
P23560	BDNF	brain derived neurotrophic factor
P54132	BLM	Bloom syndrome RecQ like helicase
Q06187	BTK	Bruton tyrosine kinase
P00915	CA1	carbonic anhydrase 1
O43570	CA12	carbonic anhydrase 12
Q9ULX7	CA14	carbonic anhydrase 14
P00918	CA2	carbonic anhydrase 2
P07451	CA3	carbonic anhydrase 3
P22748	CA4	carbonic anhydrase 4
P35218	CA5A	carbonic anhydrase 5A
Q9Y2D0	CA5B	carbonic anhydrase 5B
P23280	CA6	carbonic anhydrase 6
P43166	CA7	carbonic anhydrase 7
Q16790	CA9	carbonic anhydrase 9
Q13936	CACNA1C	calcium voltage-gated channel subunit alpha1 C
P0DP25	CALM1	calmodulin 1
P29466	CASP1	caspase 1
P42574	CASP3	caspase 3
P04040	CAT	catalase
Q13951	CBFB	core-binding factor beta subunit
P83916	CBX1	chromobox 1
P20248	CCNA2	cyclin A2
P14635	CCNB1	cyclin B1
P25942	CD40	CD40 molecule
P06493	CDK1	cyclin dependent kinase 1
P24941	CDK2	cyclin dependent kinase 2
P38936	CDKN1A	cyclin dependent kinase inhibitor 1A
P28329	CHAT	choline O-acetyltransferase
P11229	CHRM1	cholinergic receptor muscarinic 1
P43681	CHRNA4	cholinergic receptor nicotinic alpha 4 subunit
P36544	CHRNA7	cholinergic receptor nicotinic alpha 7 subunit
P02452	COL1A1	collagen type I alpha 1 chain
P07339	CTSD	cathepsin D
P08311	CTSG	cathepsin G
P07711	CTSL	cathepsin L
P10145	CXCL8	C-X-C motif chemokine ligand 8
P11511	CYP19A1	cytochrome P450 family 19 subfamily A member 1
P04798	CYP1A1	cytochrome P450 family 1 subfamily A member 1
P05177	CYP1A2	cytochrome P450 family 1 subfamily A member 2
P08684	CYP3A4	cytochrome P450 family 3 subfamily A member 4
Q9ULA0	DNPEP	aspartyl aminopeptidase
P14416	DRD2	dopamine receptor D2
P00533	EGFR	epidermal growth factor receptor
Q96KQ7	EHMT2	euchromatic histone lysine methyltransferase 2
P56537	EIF6	eukaryotic translation initiation factor 6
P08246	ELANE	elastase, neutrophil expressed
Q07075	ENPEP	glutamyl aminopeptidase
P34913	EPHX2	epoxide hydrolase 2
O75460	ERN1	endoplasmic reticulum to nucleus signaling 1
P03372	ESR1	estrogen receptor 1
Q92731	ESR2	estrogen receptor 2
O00167	EYA2	EYA transcriptional coactivator and phosphatase 2
P13726	F3	coagulation factor III, tissue factor
P00451	F8	coagulation factor VIII
O00519	FAAH	fatty acid amide hydrolase
P07148	FABP1	fatty acid binding protein 1
P12104	FABP2	fatty acid binding protein 2
P05413	FABP3	fatty acid binding protein 3
P15090	FABP4	fatty acid binding protein 4
Q01469	FABP5	fatty acid binding protein 5
P25445	FAS	Fas cell surface death receptor
P48023	FASLG	Fas ligand
O14842	FFAR1	free fatty acid receptor 1
O15552	FFAR2	free fatty acid receptor 2
Q5NUL3	FFAR4	free fatty acid receptor 4
P09038	FGF2	fibroblast growth factor 2
P01100	FOS	Fos proto-oncogene, AP-1 transcription factor subunit
P35637	FUS	FUS RNA binding protein
P06241	FYN	FYN proto-oncogene, Src family tyrosine kinase
P10253	GAA	glucosidase alpha, acid
P18507	GABRG2	gamma-aminobutyric acid type A receptor gamma2 subunit
Q05329	GAD2	glutamate decarboxylase 2
P06280	GLA	galactosidase alpha
O94925	GLS	glutaminase
P15104	GLUL	glutamate-ammonia ligase
O75496	GMNN	geminin, DNA replication inhibitor
P63092	GNAS	GNAS complex locus
Q14749	GNMT	glycine N-methyltransferase
P24298	GPT	glutamic--pyruvic transaminase
P42262	GRIA2	glutamate ionotropic receptor AMPA type subunit 2
P49841	GSK3B	glycogen synthase kinase 3 beta
P08263	GSTA1	glutathione S-transferase alpha 1
Q8TDS4	HCAR2	hydroxycarboxylic acid receptor 2
Q969S8	HDAC10	histone deacetylase 10
Q16665	HIF1A	hypoxia inducible factor 1 alpha subunit
P19367	HK1	hexokinase 1
P04035	HMGCR	3-hydroxy-3-methylglutaryl-CoA reductase
P15428	HPGD	15-hydroxyprostaglandin dehydrogenase
Q99714	HSD17B10	hydroxysteroid 17-beta dehydrogenase 10
P08238	HSP90AB1	heat shock protein 90 alpha family class B member 1
P11021	HSPA5	heat shock protein family A (Hsp70) member 5
P04792	HSPB1	heat shock protein family B (small) member 1
P46098	HTR3A	5-hydroxytryptamine receptor 3A
P34969	HTR7	5-hydroxytryptamine receptor 7
Q12794	HYAL1	hyaluronoglucosaminidase 1
P05019	IGF1	insulin like growth factor 1
P08069	IGF1R	insulin like growth factor 1 receptor
P01344	IGF2	insulin like growth factor 2
P08833	IGFBP1	insulin like growth factor binding protein 1
P18065	IGFBP2	insulin like growth factor binding protein 2
P17936	IGFBP3	insulin like growth factor binding protein 3
P24593	IGFBP5	insulin like growth factor binding protein 5
P22301	IL10	interleukin 10
P01584	IL1B	interleukin 1 beta
P05231	IL6	interleukin 6
P40189	IL6ST	interleukin 6 signal transducer
P01308	INS	insulin
P06213	INSR	insulin receptor
P35568	IRS1	insulin receptor substrate 1
P08514	ITGA2B	integrin subunit alpha 2b
P05412	JUN	Jun proto-oncogene, AP-1 transcription factor subunit
Q92830	KAT2A	lysine acetyltransferase 2A
O75449	KATNA1	katanin catalytic subunit A1
Q12809	KCNH2	potassium voltage-gated channel subfamily H member 2
O75164	KDM4A	lysine demethylase 4A
B2RXH2	KDM4E	lysine demethylase 4E
P35968	KDR	kinase insert domain receptor
Q03164	KMT2A	lysine methyltransferase 2A
Q9Y468	L3MBTL1	L3MBTL1, histone methyl-lysine binding protein
P06239	LCK	LCK proto-oncogene, Src family tyrosine kinase
P09848	LCT	lactase
P02545	LMNA	lamin A/C
Q15486	LOC100653061	putative inactive beta-glucuronidase-like protein SMA3
P06858	LPL	lipoprotein lipase
P09960	LTA4H	leukotriene A4 hydrolase
P61626	LYZ	lysozyme
P21397	MAOA	monoamine oxidase A
P27338	MAOB	monoamine oxidase B
P28482	MAPK1	mitogen-activated protein kinase 1
P53779	MAPK10	mitogen-activated protein kinase 10
P53778	MAPK12	mitogen-activated protein kinase 12
O15264	MAPK13	mitogen-activated protein kinase 13
P10636	MAPT	microtubule associated protein tau
P03956	MMP1	matrix metallopeptidase 1
P08253	MMP2	matrix metallopeptidase 2
P08254	MMP3	matrix metallopeptidase 3
P22894	MMP8	matrix metallopeptidase 8
P14780	MMP9	matrix metallopeptidase 9
P05164	MPO	myeloperoxidase
Q15788	NCOA1	nuclear receptor coactivator 1
Q16236	NFE2L2	nuclear factor, erythroid 2 like 2
P19838	NFKB1	nuclear factor kappa B subunit 1
P01138	NGF	nerve growth factor
P01857	None	None
P35228	NOS2	nitric oxide synthase 2
Q6W5P4	NPSR1	neuropeptide S receptor 1
Q96RI1	NR1H4	nuclear receptor subfamily 1 group H member 4
P04150	NR3C1	nuclear receptor subfamily 3 group C member 1
P08235	NR3C2	nuclear receptor subfamily 3 group C member 2
Q16620	NTRK2	neurotrophic receptor tyrosine kinase 2
Q8NHB7	OR5K1	olfactory receptor family 5 subfamily K member 1
Q9H244	P2RY12	purinergic receptor P2Y12
P19021	PAM	peptidylglycine alpha-amidating monooxygenase
P49585	PCYT1A	phosphate cytidylyltransferase 1, choline, alpha
P06401	PGR	progesterone receptor
P11309	PIM1	Pim-1 proto-oncogene, serine/threonine kinase
Q13526	PIN1	peptidylprolyl cis/trans isomerase, NIMA-interacting 1
P14555	PLA2G2A	phospholipase A2 group IIA
P00749	PLAU	plasminogen activator, urokinase
P00747	PLG	plasminogen
P53350	PLK1	polo like kinase 1
Q01453	PMP22	peripheral myelin protein 22
P00491	PNP	purine nucleoside phosphorylase
P06746	POLB	DNA polymerase beta
Q9UNA4	POLI	DNA polymerase iota
Q9UBT6	POLK	DNA polymerase kappa
P27169	PON1	paraoxonase 1
Q07869	PPARA	peroxisome proliferator activated receptor alpha
Q03181	PPARD	peroxisome proliferator activated receptor delta
P37231	PPARG	peroxisome proliferator activated receptor gamma
P30044	PRDX5	peroxiredoxin 5
P05771	PRKCB	protein kinase C beta
P78527	PRKDC	protein kinase, DNA-activated, catalytic polypeptide
P07477	PRSS1	serine protease 1
P28074	PSMB5	proteasome subunit beta 5
P60484	PTEN	phosphatase and tensin homolog
P43115	PTGER3	prostaglandin E receptor 3
P23219	PTGS1	prostaglandin-endoperoxide synthase 1
P35354	PTGS2	prostaglandin-endoperoxide synthase 2
Q03431	PTH1R	parathyroid hormone 1 receptor
P18031	PTPN1	protein tyrosine phosphatase, non-receptor type 1
P63000	RAC1	Rac family small GTPase 1
Q06609	RAD51	RAD51 recombinase
P04049	RAF1	Raf-1 proto-oncogene, serine/threonine kinase
O95398	RAPGEF3	Rap guanine nucleotide exchange factor 3
Q8WZA2	RAPGEF4	Rap guanine nucleotide exchange factor 4
P06400	RB1	RB transcriptional corepressor 1
P46063	RECQL	RecQ like helicase
Q04206	RELA	RELA proto-oncogene, NF-kB subunit
P61586	RHOA	ras homolog family member A
P51449	RORC	RAR related orphan receptor C
Q06455	RUNX1T1	RUNX1 translocation partner 1
P19793	RXRA	retinoid X receptor alpha
Q14524	SCN5A	sodium voltage-gated channel alpha subunit 5
P16581	SELE	selectin E
P14151	SELL	selectin L
P16109	SELP	selectin P
P05121	SERPINE1	serpin family E member 1
P14410	SI	sucrase-isomaltase
Q9NSA0	SLC22A11	solute carrier family 22 member 11
O76082	SLC22A5	solute carrier family 22 member 5
Q4U2R8	SLC22A6	solute carrier family 22 member 6
Q8TCC7	SLC22A8	solute carrier family 22 member 8
O43826	SLC37A4	solute carrier family 37 member 4
P23975	SLC6A2	solute carrier family 6 member 2
Q01959	SLC6A3	solute carrier family 6 member 3
P31645	SLC6A4	solute carrier family 6 member 4
P30825	SLC7A1	solute carrier family 7 member 1
Q9Y6L6	SLCO1B1	solute carrier organic anion transporter family member 1B1
Q9NPD5	SLCO1B3	solute carrier organic anion transporter family member 1B3
O94956	SLCO2B1	solute carrier organic anion transporter family member 2B1
P84022	SMAD3	SMAD family member 3
P35610	SOAT1	sterol O-acyltransferase 1
P00441	SOD1	superoxide dismutase 1
Q9NYA1	SPHK1	sphingosine kinase 1
P10451	SPP1	secreted phosphoprotein 1
P12931	SRC	SRC proto-oncogene, non-receptor tyrosine kinase
P42224	STAT1	signal transducer and activator of transcription 1
P40763	STAT3	signal transducer and activator of transcription 3
P51692	STAT5B	signal transducer and activator of transcription 5B
Q13148	TARDBP	TAR DNA binding protein
P24557	TBXAS1	thromboxane A synthase 1
Q9NUW8	TDP1	tyrosyl-DNA phosphodiesterase 1
Q99973	TEP1	telomerase associated protein 1
O14746	TERT	telomerase reverse transcriptase
P48307	TFPI2	tissue factor pathway inhibitor 2
P10828	THRB	thyroid hormone receptor beta
O60603	TLR2	toll like receptor 2
P01375	TNF	tumor necrosis factor
O00220	TNFRSF10A	TNF receptor superfamily member 10a
O14763	TNFRSF10B	TNF receptor superfamily member 10b
Q9Y6Q6	TNFRSF11A	TNF receptor superfamily member 11a
O00300	TNFRSF11B	TNF receptor superfamily member 11b
P19438	TNFRSF1A	TNF receptor superfamily member 1A
P20333	TNFRSF1B	TNF receptor superfamily member 1B
P50591	TNFSF10	TNF superfamily member 10
O14788	TNFSF11	TNF superfamily member 11
Q9Y275	TNFSF13B	TNF superfamily member 13b
P11387	TOP1	DNA topoisomerase I
P04637	TP53	tumor protein p53
O75762	TRPA1	transient receptor potential cation channel subfamily A member 1
Q8NER1	TRPV1	transient receptor potential cation channel subfamily V member 1
Q8NET8	TRPV3	transient receptor potential cation channel subfamily V member 3
P16473	TSHR	thyroid stimulating hormone receptor
P02766	TTR	transthyretin
P14679	TYR	tyrosinase
P09936	UCHL1	ubiquitin C-terminal hydrolase L1
P22309	UGT1A1	UDP glucuronosyltransferase family 1 member A1
Q9HAW8	UGT1A10	UDP glucuronosyltransferase family 1 member A10
P35503	UGT1A3	UDP glucuronosyltransferase family 1 member A3
P22310	UGT1A4	UDP glucuronosyltransferase family 1 member A4
P19224	UGT1A6	UDP glucuronosyltransferase family 1 member A6
Q9HAW7	UGT1A7	UDP glucuronosyltransferase family 1 member A7
Q9HAW9	UGT1A8	UDP glucuronosyltransferase family 1 member A8
O60656	UGT1A9	UDP glucuronosyltransferase family 1 member A9
Q9Y4X1	UGT2A1	UDP glucuronosyltransferase family 2 member A1 complex locus
O94782	USP1	ubiquitin specific peptidase 1
O75604	USP2	ubiquitin specific peptidase 2
P11473	VDR	vitamin D receptor
P15692	VEGFA	vascular endothelial growth factor A
P47989	XDH	xanthine dehydrogenase

## Sheet: Zhigancao
Uniprot_ID	Gene Symbol	Description
P80404	ABAT	4-aminobutyrate aminotransferase
P33527	ABCC1	ATP binding cassette subfamily C member 1
Q13085	ACACA	acetyl-CoA carboxylase alpha
P22303	ACHE	acetylcholinesterase (Cartwright blood group)
P15309	ACPP	acid phosphatase, prostate
P00325	ADH1B	alcohol dehydrogenase 1B (class I), beta polypeptide
P00326	ADH1C	alcohol dehydrogenase 1C (class I), gamma polypeptide
P35348	ADRA1A	adrenoceptor alpha 1A
P35368	ADRA1B	adrenoceptor alpha 1B
P08913	ADRA2A	adrenoceptor alpha 2A
P18825	ADRA2C	adrenoceptor alpha 2C
P08588	ADRB1	adrenoceptor beta 1
P07550	ADRB2	adrenoceptor beta 2
P35869	AHR	aryl hydrocarbon receptor
P15121	AKR1B1	aldo-keto reductase family 1 member B
O60218	AKR1B10	aldo-keto reductase family 1 member B10
Q04828	AKR1C1	aldo-keto reductase family 1 member C1
P42330	AKR1C3	aldo-keto reductase family 1 member C3
P09917	ALOX5	arachidonate 5-lipoxygenase
P04746	AMY2A	amylase, alpha 2A (pancreatic)
P27695	APEX1	apurinic/apyrimidinic endodeoxyribonuclease 1
P10275	AR	androgen receptor
P06576	ATP5F1B	ATP synthase F1 subunit beta
P56817	BACE1	beta-secretase 1
P06276	BCHE	butyrylcholinesterase
P10415	BCL2	BCL2, apoptosis regulator
P0DP25	CALM1	calmodulin 1
CASP3	CASP3	caspase 3
P04040	CAT	catalase
CCL11	CCL11	C-C motif chemokine ligand 11
P13500	CCL2	C-C motif chemokine ligand 2
P78556	CCL20	C-C motif chemokine ligand 20
P20248	CCNA2	cyclin A2
CCND1	CCND1	cyclin D1
P25942	CD40	CD40 molecule
P06493	CDK1	cyclin dependent kinase 1
P24941	CDK2	cyclin dependent kinase 2
CDK2	CDK2	cyclin dependent kinase 2
P11802	CDK4	cyclin dependent kinase 4
CDK4	CDK4	cyclin dependent kinase 4
Q00534	CDK6	cyclin dependent kinase 6
P23141	CES1	carboxylesterase 1
O00748	CES2	carboxylesterase 2
P11229	CHRM1	cholinergic receptor muscarinic 1
P02452	COL1A1	collagen type I alpha 1 chain
P02461	COL3A1	collagen type III alpha 1 chain
CTNNA1	CTNNA1	catenin alpha 1
CTNNB1	CTNNB1	catenin beta 1
P07858	CTSB	cathepsin B
P07339	CTSD	cathepsin D
CYP11B2	CYP11B2	cytochrome P450 family 11 subfamily B member 2
P05177	CYP1A2	cytochrome P450 family 1 subfamily A member 2
P33261	CYP2C19	cytochrome P450 family 2 subfamily C member 19
P11712	CYP2C9	cytochrome P450 family 2 subfamily C member 9
P10635	CYP2D6	cytochrome P450 family 2 subfamily D member 6
CYP2E1	CYP2E1	cytochrome P450 family 2 subfamily E member 1
P08684	CYP3A4	cytochrome P450 family 3 subfamily A member 4
Q9HB55	CYP3A43	cytochrome P450 family 3 subfamily A member 43
P27487	DPP4	dipeptidyl peptidase 4
P01133	EGF	epidermal growth factor
P00533	EGFR	epidermal growth factor receptor
P03372	ESR1	estrogen receptor 1
Q92731	ESR2	estrogen receptor 2
P13726	F3	coagulation factor III, tissue factor
P00451	F8	coagulation factor VIII
P25445	FAS	Fas cell surface death receptor
P48023	FASLG	Fas ligand
P49327	FASN	fatty acid synthase
P09038	FGF2	fibroblast growth factor 2
FOS	FOS	Fos proto-oncogene, AP-1 transcription factor subunit
P17302	GJA1	gap junction protein alpha 1
GJA1	GJA1	gap junction protein alpha 1
O75496	GMNN	geminin, DNA replication inhibitor
P17174	GOT1	glutamic-oxaloacetic transaminase 1
Q8TD30	GPT2	glutamic--pyruvic transaminase 2
GPT2	GPT2	glutamic--pyruvic transaminase 2
P42262	GRIA2	glutamate ionotropic receptor AMPA type subunit 2
Q8TCU5	GRIN3A	glutamate ionotropic receptor NMDA type subunit 3A
P49841	GSK3B	glycogen synthase kinase 3 beta
P00390	GSR	glutathione-disulfide reductase
P09488	GSTM1	glutathione S-transferase mu 1
P28161	GSTM2	glutathione S-transferase mu 2
P09211	GSTP1	glutathione S-transferase pi 1
HERC5	HERC5	HECT and RLD domain containing E3 ubiquitin protein ligase 5
HMGB1	HMGB1	high mobility group box 1
P04035	HMGCR	3-hydroxy-3-methylglutaryl-CoA reductase
P09601	HMOX1	heme oxygenase 1
HMOX1	HMOX1	heme oxygenase 1
P28845	HSD11B1	hydroxysteroid 11-beta dehydrogenase 1
HSD11B2	HSD11B2	hydroxysteroid 11-beta dehydrogenase 2
P80365	HSD11B2	hydroxysteroid 11-beta dehydrogenase 2
P14061	HSD17B1	hydroxysteroid 17-beta dehydrogenase 1
Q99714	HSD17B10	hydroxysteroid 17-beta dehydrogenase 10
P37059	HSD17B2	hydroxysteroid 17-beta dehydrogenase 2
P11021	HSPA5	heat shock protein family A (Hsp70) member 5
P46098	HTR3A	5-hydroxytryptamine receptor 3A
P01579	IFNG	interferon gamma
P05019	IGF1	insulin like growth factor 1
P08069	IGF1R	insulin like growth factor 1 receptor
P01344	IGF2	insulin like growth factor 2
P08833	IGFBP1	insulin like growth factor binding protein 1
P18065	IGFBP2	insulin like growth factor binding protein 2
P17936	IGFBP3	insulin like growth factor binding protein 3
P24593	IGFBP5	insulin like growth factor binding protein 5
P01584	IL1B	interleukin 1 beta
P60568	IL2	interleukin 2
Q9NPF7	IL23A	interleukin 23 subunit alpha
P01589	IL2RA	interleukin 2 receptor subunit alpha
P05231	IL6	interleukin 6
P40189	IL6ST	interleukin 6 signal transducer
P01308	INS	insulin
P06213	INSR	insulin receptor
P35568	IRS1	insulin receptor substrate 1
P05107	ITGB2	integrin subunit beta 2
O60674	JAK2	Janus kinase 2
P05412	JUN	Jun proto-oncogene, AP-1 transcription factor subunit
JUN	JUN	Jun proto-oncogene, AP-1 transcription factor subunit
JUP	JUP	junction plakoglobin
Q12809	KCNH2	potassium voltage-gated channel subfamily H member 2
P35968	KDR	kinase insert domain receptor
Q03164	KMT2A	lysine methyltransferase 2A
P09848	LCT	lactase
P01130	LDLR	low density lipoprotein receptor
P02545	LMNA	lamin A/C
P61626	LYZ	lysozyme
P21397	MAOA	monoamine oxidase A
P27338	MAOB	monoamine oxidase B
P28482	MAPK1	mitogen-activated protein kinase 1
P53779	MAPK10	mitogen-activated protein kinase 10
P53778	MAPK12	mitogen-activated protein kinase 12
O15264	MAPK13	mitogen-activated protein kinase 13
P27361	MAPK3	mitogen-activated protein kinase 3
P45983	MAPK8	mitogen-activated protein kinase 8
P10636	MAPT	microtubule associated protein tau
O43451	MGAM	maltase-glucoamylase
P03956	MMP1	matrix metallopeptidase 1
P09238	MMP10	matrix metallopeptidase 10
P08253	MMP2	matrix metallopeptidase 2
P08254	MMP3	matrix metallopeptidase 3
P05164	MPO	myeloperoxidase
MPO	MPO	myeloperoxidase
MYC	MYC	MYC proto-oncogene, bHLH transcription factor
Q15788	NCOA1	nuclear receptor coactivator 1
P03923	ND6	NADH dehydrogenase, subunit 6 (complex I)
Q16236	NFE2L2	nuclear factor, erythroid 2 like 2
P19838	NFKB1	nuclear factor kappa B subunit 1
P01857	None	None
P35228	NOS2	nitric oxide synthase 2
NOS2	NOS2	nitric oxide synthase 2
P15559	NQO1	NAD(P)H quinone dehydrogenase 1
P04150	NR3C1	nuclear receptor subfamily 3 group C member 1
NR3C1	NR3C1	nuclear receptor subfamily 3 group C member 1
P08235	NR3C2	nuclear receptor subfamily 3 group C member 2
P11926	ODC1	ornithine decarboxylase 1
P41143	OPRD1	opioid receptor delta 1
P35372	OPRM1	opioid receptor mu 1
P06401	PGR	progesterone receptor
P11309	PIM1	Pim-1 proto-oncogene, serine/threonine kinase
P14618	PKM	pyruvate kinase M1/2
P00750	PLAT	plasminogen activator, tissue type
P00749	PLAU	plasminogen activator, urokinase
P53350	PLK1	polo like kinase 1
POLB	POLB	DNA polymerase beta
POLK	POLK	DNA polymerase kappa
Q9UBT6	POLK	DNA polymerase kappa
P27169	PON1	paraoxonase 1
P16435	POR	cytochrome p450 oxidoreductase
Q03181	PPARD	peroxisome proliferator activated receptor delta
Q08209	PPP3CA	protein phosphatase 3 catalytic subunit alpha
P24723	PRKCH	protein kinase C eta
P07477	PRSS1	serine protease 1
P43115	PTGER3	prostaglandin E receptor 3
P23219	PTGS1	prostaglandin-endoperoxide synthase 1
P35354	PTGS2	prostaglandin-endoperoxide synthase 2
PTGS2	PTGS2	prostaglandin-endoperoxide synthase 2
P18031	PTPN1	protein tyrosine phosphatase, non-receptor type 1
Q06124	PTPN11	protein tyrosine phosphatase, non-receptor type 11
P29350	PTPN6	protein tyrosine phosphatase, non-receptor type 6
P35236	PTPN7	protein tyrosine phosphatase, non-receptor type 7
P06400	RB1	RB transcriptional corepressor 1
RELA	RELA	RELA proto-oncogene, NF-kB subunit
P19793	RXRA	retinoid X receptor alpha
P28702	RXRB	retinoid X receptor beta
Q14524	SCN5A	sodium voltage-gated channel alpha subunit 5
P16581	SELE	selectin E
P23975	SLC6A2	solute carrier family 6 member 2
Q01959	SLC6A3	solute carrier family 6 member 3
P31645	SLC6A4	solute carrier family 6 member 4
P30825	SLC7A1	solute carrier family 7 member 1
Q9Y6L6	SLCO1B1	solute carrier organic anion transporter family member 1B1
Q9NPD5	SLCO1B3	solute carrier organic anion transporter family member 1B3
P35610	SOAT1	sterol O-acyltransferase 1
P00441	SOD1	superoxide dismutase 1
STAT3	STAT3	signal transducer and activator of transcription 3
P49888	SULT1E1	sulfotransferase family 1E member 1
P21731	TBXA2R	thromboxane A2 receptor
P48307	TFPI2	tissue factor pathway inhibitor 2
P07204	THBD	thrombomodulin
P01375	TNF	tumor necrosis factor
TNF	TNF	tumor necrosis factor
O00220	TNFRSF10A	TNF receptor superfamily member 10a
O14763	TNFRSF10B	TNF receptor superfamily member 10b
Q9Y6Q6	TNFRSF11A	TNF receptor superfamily member 11a
O00300	TNFRSF11B	TNF receptor superfamily member 11b
P19438	TNFRSF1A	TNF receptor superfamily member 1A
P20333	TNFRSF1B	TNF receptor superfamily member 1B
P50591	TNFSF10	TNF superfamily member 10
O14788	TNFSF11	TNF superfamily member 11
Q9Y275	TNFSF13B	TNF superfamily member 13b
P11387	TOP1	DNA topoisomerase I
P04637	TP53	tumor protein p53
P19320	VCAM1	vascular cell adhesion molecule 1
P15692	VEGFA	vascular endothelial growth factor A
P47989	XDH	xanthine dehydrogenase

## Sheet: 5herbs_summary
Gene Symbol
AADAC
ABAT
ABCB1
ABCC1
ABCG2
ACACA
ACHE
ACPP
ACSL1
ACSL4
ADH1B
ADH1C
ADORA2A
ADRA1A
ADRA1B
ADRA2A
ADRA2C
ADRB1
ADRB2
AHCYL1
AHR
AKR1B1
AKR1B10
AKR1C1
AKR1C3
AKT1
ALAD
ALB
ALDH1A1
ALDH2
ALDH5A1
ALOX15
ALOX15B
ALOX5
AMY1A
AMY2A
AOC3
APEX1
APOBEC3F
APP
AQP9
AR
ARG2
ARHGAP35
ARSA
ATAD5
ATP5F1B
AURKA
AURKB
BACE1
BAD
BAX
BAZ2B
BCHE
BCL2
BDNF
BLM
BRAF
BTK
CA1
CA12
CA13
CA14
CA2
CA3
CA4
CA5A
CA5B
CA6
CA7
CA9
CACNA1C
CALM1
CASP1
CASP3
CASP9
CAT
CBFB
CBX1
CCL11
CCL2
CCL20
CCNA2
CCNB1
CCNB2
CCND1
CD40
CD80
CD86
CDK1
CDK2
CDK4
CDK5R1
CDK6
CDKN1A
CER1
CES1
CES2
CHAD
CHAT
CHRM1
CHRNA4
CHRNA7
COL1A1
COL3A1
CREBBP
CSNK2A2
CTDSP1
CTNNA1
CTNNB1
CTSB
CTSD
CTSG
CTSL
CXCL8
CYP11B2
CYP19A1
CYP1A1
CYP1A2
CYP1B1
CYP2A13
CYP2A6
CYP2C19
CYP2C9
CYP2D6
CYP2E1
CYP3A4
CYP3A43
DAO
DBP
DDO
DGAT1
DHCR7
DMRTC1
DNPEP
DPP4
DRD2
EGF
EGFR
EHHADH
EHMT2
EIF6
ELANE
EMILIN3
ENPEP
EPHX2
EPX
ERN1
ESR1
ESR2
ESRRA
ESRRB
EYA2
F3
F8
FAAH
FABP1
FABP2
FABP3
FABP4
FABP5
FAS
FASLG
FASN
FEN1
FFAR1
FFAR2
FFAR4
FGF2
FLT3
FOS
FUS
FUT7
FYN
GAA
GABRG2
GAD1
GAD2
GBA
GDF9
GFER
GJA1
GLA
GLI1
GLO1
GLP1R
GLS
GLUL
GMNN
GNAS
GNMT
GOT1
GPBAR1
GPT
GPT2
GRIA2
GRIN3A
GRINA
GSK3B
GSKIP
GSR
GSTA1
GSTM1
GSTM2
GSTP1
HCAR2
HCAR3
HDAC10
HERC5
HEXA
HIF1A
HK1
HMGB1
HMGCR
HMOX1
HPGD
HRC
HRH3
HRH4
HSD11B1
HSD11B2
HSD17B1
HSD17B10
HSD17B2
HSP90AB1
HSPA5
HSPB1
HTR3A
HTR7
HTT
HYAL1
IDH1
IFNG
IGF1
IGF1R
IGF2
IGFBP1
IGFBP2
IGFBP3
IGFBP5
IKBKB
IL10
IL1B
IL2
IL23A
IL2RA
IL6
IL6ST
INS
INSR
IRS1
ITGA2B
ITGB2
ITK
JAK2
JAK3
JUN
JUP
KAT2A
KATNA1
KCNH2
KCNK2
KDM4A
KDM4E
KDR
KIT
KMT2A
L3MBTL1
LCK
LCT
LDLR
LGALS3
LIPA
LMNA
LOC100653061
LPL
LTA4H
LYVE1
LYZ
MAOA
MAOB
MAP2
MAP2K1
MAPK1
MAPK10
MAPK12
MAPK13
MAPK14
MAPK3
MAPK8
MAPKAPK2
MAPT
MET
MGAM
MMP1
MMP10
MMP2
MMP3
MMP8
MMP9
MPG
MPO
MTOR
MYC
NCOA1
ND6
NEU2
NFE2L2
NFKB1
NGF
NISCH
None
NOS2
NOX4
NPSR1
NQO1
NR1H3
NR1H4
NR3C1
NR3C2
NTRK2
ODC1
OPRD1
OPRM1
OR5K1
P2RY12
PAK2
PAM
PCYT1A
PDE5A
PDK1
PF4
PGR
PIK3CA
PIK3CD
PIK3CG
PIM1
PIN1
PKD2
PKM
PLA2G2A
PLA2G4A
PLAT
PLAU
PLB1
PLG
PLK1
PMP22
PNP
POLB
POLG
POLH
POLI
POLK
PON1
POR
PPARA
PPARD
PPARG
PPP3CA
PRDX5
PREP
PRKCA
PRKCB
PRKCH
PRKDC
PROCR
PRSS1
PRTFDC1
PSAP
PSMB5
PTEN
PTGER3
PTGS1
PTGS2
PTH1R
PTK2
PTN
PTP4A3
PTPN1
PTPN11
PTPN13
PTPN6
PTPN7
PTPRS
RAC1
RACGAP1
RAD51
RAF1
RAPGEF3
RAPGEF4
RAX
RB1
RECQL
RELA
RGS4
RHOA
RNASE1
ROBO1
ROCK1
RORC
RUNX1T1
RXRA
RXRB
SAE1
SCN5A
SELE
SELL
SELP
SERPINC1
SERPIND1
SERPINE1
SGK1
SI
SLC22A11
SLC22A5
SLC22A6
SLC22A8
SLC23A1
SLC37A4
SLC47A1
SLC6A2
SLC6A3
SLC6A4
SLC7A1
SLCO1B1
SLCO1B3
SLCO2B1
SMAD3
SOAT1
SOCS1
SOD1
SP6
SPHK1
SPP1
SRC
SRD5A1
STAT1
STAT3
STAT5B
SULT1E1
SYK
TARDBP
TAS2R5
TBXA2R
TBXAS1
TDP1
TEP1
TERT
TFPI2
THBD
THRB
TLR2
TLR3
TNF
TNFRSF10A
TNFRSF10B
TNFRSF11A
TNFRSF11B
TNFRSF1A
TNFRSF1B
TNFSF10
TNFSF11
TNFSF13B
TOP1
TOP2A
TP53
TPMT
TRPA1
TRPM3
TRPV1
TRPV3
TSG101
TSHR
TTR
TYR
UBA2
UCHL1
UGT1A1
UGT1A10
UGT1A3
UGT1A4
UGT1A6
UGT1A7
UGT1A8
UGT1A9
UGT2A1
UGT2B7
USP1
USP2
VCAM1
VDR
VEGFA
VEGFD
VTN
XDH
XRCC5

## Sheet: TTD Targets
uniprot	Gene Symbol	Description
P00749	PLAU	plasminogen activator, urokinase
P35354	PTGS2	prostaglandin-endoperoxide synthase 2
P10275	AR	androgen receptor
P03372	ESR1	estrogen receptor 1
Q92731	ESR2	estrogen receptor 2
P08913	ADRA2A	adrenoceptor alpha 2A
P23219	PTGS1	prostaglandin-endoperoxide synthase 1
P22303	ACHE	acetylcholinesterase (Cartwright blood group)
P35372	OPRM1	opioid receptor mu 1
P41143	OPRD1	opioid receptor delta 1
P04150	NR3C1	nuclear receptor subfamily 3 group C member 1
P11229	CHRM1	cholinergic receptor muscarinic 1
P21397	MAOA	monoamine oxidase A
P27338	MAOB	monoamine oxidase B
P35348	ADRA1A	adrenoceptor alpha 1A
P46098	HTR3A	5-hydroxytryptamine receptor 3A
P06401	PGR	progesterone receptor
Q14524	SCN5A	sodium voltage-gated channel alpha subunit 5
P23975	SLC6A2	solute carrier family 6 member 2
P31645	SLC6A4	solute carrier family 6 member 4
P14416	DRD2	dopamine receptor D2
P00451	F8	coagulation factor VIII
Q01959	SLC6A3	solute carrier family 6 member 3
P19793	RXRA	retinoid X receptor alpha
P07550	ADRB2	adrenoceptor beta 2
P35368	ADRA1B	adrenoceptor alpha 1B
P18825	ADRA2C	adrenoceptor alpha 2C
Q9ULX7	CA14	carbonic anhydrase 14
P27487	DPP4	dipeptidyl peptidase 4
P00915	CA1	carbonic anhydrase 1
P04062	GBA	glucosylceramidase beta
P05067	APP	amyloid beta precursor protein
P22748	CA4	carbonic anhydrase 4
Q03431	PTH1R	parathyroid hormone 1 receptor
P00918	CA2	carbonic anhydrase 2
P02768	ALB	albumin
P18031	PTPN1	protein tyrosine phosphatase non-receptor type 1
P15692	VEGFA	vascular endothelial growth factor A
P10415	BCL2	BCL2 apoptosis regulator
P35968	KDR	kinase insert domain receptor
P01375	TNF	tumor necrosis factor
P49327	FASN	fatty acid synthase
P03956	MMP1	matrix metallopeptidase 1
P01584	IL1B	interleukin 1 beta
P06858	LPL	lipoprotein lipase
P09917	ALOX5	arachidonate 5-lipoxygenase
Q12809	KCNH2	potassium voltage-gated channel subfamily H member 2
P06213	INSR	insulin receptor
P42345	MTOR	mechanistic target of rapamycin kinase
P15121	AKR1B1	aldo-keto reductase family 1 member B
P08235	NR3C2	nuclear receptor subfamily 3 group C member 2
Q08209	PPP3CA	protein phosphatase 3 catalytic subunit alpha
P08588	ADRB1	adrenoceptor beta 1
P42330	AKR1C3	aldo-keto reductase family 1 member C3
O14788	TNFSF11	TNF superfamily member 11
P10721	KIT	KIT proto-oncogene, receptor tyrosine kinase
P01008	SERPINC1	serpin family C member 1
O75907	DGAT1	diacylglycerol O-acyltransferase 1
Q07869	PPARA	peroxisome proliferator activated receptor alpha
P33527	ABCC1	ATP binding cassette subfamily C member 1
P11473	VDR	vitamin D receptor
P11511	CYP19A1	cytochrome P450 family 19 subfamily A member 1
Q13332	PTPRS	protein tyrosine phosphatase receptor type S
P00533	EGFR	epidermal growth factor receptor
O76074	PDE5A	phosphodiesterase 5A
P08183	ABCB1	ATP binding cassette subfamily B member 1
Q00534	CDK6	cyclin dependent kinase 6
P37231	PPARG	peroxisome proliferator activated receptor gamma
P11712	CYP2C9	cytochrome P450 family 2 subfamily C member 9
P36888	FLT3	fms related tyrosine kinase 3
Q9UNQ0	ABCG2	ATP binding cassette subfamily G member 2 (Junior blood group)
P43220	GLP1R	glucagon like peptide 1 receptor
P14679	TYR	tyrosinase
P05231	IL6	interleukin 6
P60568	IL2	interleukin 2
P01589	IL2RA	interleukin 2 receptor subunit alpha
P33681	CD80	CD80 molecule
P42081	CD86	CD86 molecule
Q9NPF7	IL23A	interleukin 23 subunit alpha
O75762	TRPA1	transient receptor potential cation channel subfamily A member 1
P10828	THRB	thyroid hormone receptor beta
P52333	JAK3	Janus kinase 3
P16473	TSHR	thyroid stimulating hormone receptor
Q8TCC7	SLC22A8	solute carrier family 22 member 8
P08581	MET	MET proto-oncogene, receptor tyrosine kinase
P06239	LCK	LCK proto-oncogene, Src family tyrosine kinase
P08069	IGF1R	insulin like growth factor 1 receptor
P15056	BRAF	B-Raf proto-oncogene, serine/threonine kinase
O00329	PIK3CD	phosphatidylinositol-4,5-bisphosphate 3-kinase catalytic subunit delta
P48736	PIK3CG	phosphatidylinositol-4,5-bisphosphate 3-kinase catalytic subunit gamma
Q96RI1	NR1H4	nuclear receptor subfamily 1 group H member 4
P51649	ALDH5A1	aldehyde dehydrogenase 5 family member A1
P08253	MMP2	matrix metallopeptidase 2
P09038	FGF2	fibroblast growth factor 2
P04035	HMGCR	3-hydroxy-3-methylglutaryl-CoA reductase
Q06187	BTK	Bruton tyrosine kinase
P01308	INS	insulin
P13716	ALAD	aminolevulinate dehydratase
P00747	PLG	plasminogen
P80404	ABAT	4-aminobutyrate aminotransferase
P29274	ADORA2A	adenosine A2a receptor
P43681	CHRNA4	cholinergic receptor nicotinic alpha 4 subunit
P30044	PRDX5	peroxiredoxin 5
P18507	GABRG2	gamma-aminobutyric acid type A receptor gamma2 subunit
P84022	SMAD3	SMAD family member 3
Q16853	AOC3	amine oxidase copper containing 3
P09960	LTA4H	leukotriene A4 hydrolase
Q9H244	P2RY12	purinergic receptor P2Y12
P36544	CHRNA7	cholinergic receptor nicotinic alpha 7 subunit
P40763	STAT3	signal transducer and activator of transcription 3
P06241	FYN	FYN proto-oncogene, Src family tyrosine kinase
O00519	FAAH	fatty acid amide hydrolase
P12931	SRC	SRC proto-oncogene, non-receptor tyrosine kinase
P11802	CDK4	cyclin dependent kinase 4
P01130	LDLR	low density lipoprotein receptor
O43451	MGAM	maltase-glucoamylase
P21731	TBXA2R	thromboxane A2 receptor
P35222	CTNNB1	catenin beta 1
P10635	CYP2D6	cytochrome P450 family 2 subfamily D member 6
