# Supplementary material for: In Silico Study of Anti-Insomnia Mechanism for Suanzaoren Prescription
Source: Front Pharmacol. 2019 Aug 22;10:925. doi: 10.3389/fphar.2019.00925 (PMC6713715; doi:10.3389/fphar.2019.00925)
Supplement: Supplementary file 2 [file Table_2.xlsx]

## Sheet: Sheet1
KEGG_type	map_id	map_name	all_LogP	all_%InGO
Cancers: Overview	hsa05200	Pathways in cancer	50.7008	15.7576
Endocrine and metabolic diseases	hsa04933	AGE-RAGE signaling pathway in diabetic complications	42.6883	8.48485
Infectious diseases: Viral	hsa05161	Hepatitis B	38.6563	9.09091
Cardiovascular diseases	hsa05418	Fluid shear stress and atherosclerosis	37.616	8.88889
Cancers: Overview	hsa05205	Proteoglycans in cancer	33.7114	9.49495
Signal transduction	hsa04151	PI3K-Akt signaling pathway	33.6792	11.7172
Drug resistance: Antineoplastic	hsa01522	Endocrine resistance	32.8202	7.07071
Cancers: Specific types	hsa05215	Prostate cancer	30.1833	6.46465
Signal transduction	hsa04068	FoxO signaling pathway	29.8759	7.47475
Immune system	hsa04659	Th17 cell differentiation	29.5457	6.86869
Endocrine system	hsa04917	Prolactin signaling pathway	27.6865	5.65657
Infectious diseases: Viral	hsa05164	Influenza A	27.5338	7.87879
Cancers: Overview	hsa05204	Chemical carcinogenesis	26.813	5.85859
Infectious diseases: Parasitic	hsa05142	Chagas disease (American trypanosomiasis)	26.3002	6.26263
Signal transduction	hsa04024	cAMP signaling pathway	26.2747	8.08081
Cellular community - eukaryotes	hsa04510	Focal adhesion	26.186	8.08081
Drug resistance: Antineoplastic	hsa01521	EGFR tyrosine kinase inhibitor resistance	25.9354	5.65657
Lipid metabolism	hsa00140	Steroid hormone biosynthesis	25.7689	5.05051
Signal transduction	hsa04370	VEGF signaling pathway	25.5384	5.05051
Cell growth and death	hsa04210	Apoptosis	25.4281	6.86869
Xenobiotics biodegradation and metabolism	hsa00980	Metabolism of xenobiotics by cytochrome P45	25.4253	5.45455
Cancers: Specific types	hsa05210	Colorectal cancer	25.3131	5.05051
Nervous system	hsa04722	Neurotrophin signaling pathway	25.2616	6.46465
Signal transduction	hsa04066	HIF-1 signaling pathway	25.1331	6.06061
Infectious diseases: Bacterial	hsa05152	Tuberculosis	24.7032	7.47475
Cancers: Specific types	hsa05223	Non-small cell lung cancer	24.232	4.84848
Signal transduction	hsa04668	TNF signaling pathway	24.1712	6.06061
Development	hsa04380	Osteoclast differentiation	23.9441	6.46465
Cancers: Specific types	hsa05221	Acute myeloid leukemia	23.3732	4.64646
Signal transduction	hsa04071	Sphingolipid signaling pathway	22.9248	6.06061
Signal transduction	hsa04010	MAPK signaling pathway	22.9042	8.28283
Infectious diseases: Viral	hsa05160	Hepatitis C	22.65	6.26263
Cancers: Specific types	hsa05224	Breast cancer	22.4544	6.46465
Immune system	hsa04657	IL-17 signaling pathway	22.3721	5.45455
Immune system	hsa04660	T cell receptor signaling pathway	22.3064	5.65657
Infectious diseases: Parasitic	hsa05145	Toxoplasmosis	22.3034	5.85859
Immune system	hsa04620	Toll-like receptor signaling pathway	22.1789	5.65657
Cancers: Specific types	hsa05214	Glioma	21.557	4.64646
Signal transduction	hsa04014	Ras signaling pathway04015Rap1 signaling pathway	20.9151	7.47475
Cancers: Specific types	hsa05219	Bladder cancer	20.4621	3.83838
Infectious diseases: Viral	hsa05162	Measles	20.0507	5.85859
Infectious diseases: Bacterial	hsa05133	Pertussis	19.5973	4.64646
Endocrine system	hsa04919	Thyroid hormone signaling pathway	19.5891	5.45455
Signal transduction	hsa04012	ErbB signaling pathway	19.4934	4.84848
Cancers: Specific types	hsa05218	Melanoma	19.3289	4.44444
Cancers: Specific types	hsa05220	Chronic myeloid leukemia	19.0216	4.44444
Cancers: Overview	hsa05203	Viral carcinogenesis	18.8009	6.66667
Nervous system	hsa04726	Serotonergic synapse	18.7475	5.25253
Cancers: Overview	hsa05230	Central carbon metabolism in cancer	18.6122	4.24242
Cancers: Specific types	hsa05213	Endometrial cancer	18.447	3.83838
