# Supplementary material for: In Silico Study of Anti-Insomnia Mechanism for Suanzaoren Prescription
Source: Front Pharmacol. 2019 Aug 22;10:925. doi: 10.3389/fphar.2019.00925 (PMC6713715; doi:10.3389/fphar.2019.00925)
Supplement: Supplementary file 3 [file Table_3.xlsx]

## Sheet: Fig4_targets
Figure_lable	Gene_Symbol	Contribution_from_herb_group
AchE	ACHE	1234
ADORA	ADORA21	3
Akt	AKT	2
BAD	BAD	2
Bcl-2	BCL2	234
BDNF	BDNF	3
CaM	VCAM1	24
Casp3	CASP3	234
ChAT	CHAT	3
DAT	SLC6A3	1234
DR	DRD2	13
FOS	FOS	34
GABRA	GABRG2	13
GAD	GAD1	2
GLS	GLS	3
GSK-3	GSK3B	1234
HTR	HTR	1234
MAPK	MAPK14	2
nAChR	CHRNA	3
NFκB	NFKB1	234
NGF	NGF	3
OPR	OPRD1	124
PKC	PRKCA	2
Raf	RAF1	23
RhoA	RHOA	3
SERT	SLC6A4	1234
TrkB	NTRK2	3
VGCC	CACNA	3
		*1:Jun; 2.Chen; 3:Zuo; 4:Shi

## Sheet: Fig4_map
Fig4's reference map from KEGG
KEGG_ref_map_id	KEGG_map_name
hsa04722	Neurotrophin signaling pathway
hsa04080	Neuroactive ligand-receptor interaction
hsa04726	Serotonergic synapse
hsa04725	Cholinergic synapse
hsa04728	Dopaminergic synapse
hsa04724	Glutamatergic synapse
hsa04727	GABAergic synapse
hsa05032	Morphine addiction

## Sheet: Fig5_targets
Figure_lable	Gene_Symbol	Contribution_from_herb_group
Akt	AKT	2
BAD	BAD	2
Bcl-2	BCL2	234
Casp9	CASP9	2
CDK	CDK2	1234
Cox2	PTGS2	1234
Cyclin	CCND1	4
CytokineR	SCN	1234
FAK	PTK2	2
FOS	FOS	34
GSK3	GSK3	1234
HIF1α	HIF1A	23
IL-1	IL1B	234
IL-10	IL-10	3
IL-2	IL-2	24
IL-6	IL6	234
IL-8	CXCL8	23
ITGA	ITGA2B	3
ITGB	ITGB2	4
JAK	JAK	24
Myc	MYC	4
NFκB	NFKB	234
P21	CDKN1A	23
P53	TP53	234
PI3K	PIK3CA	2
Raf	RAF1	23
RXRα	RXRA	1234
TNF-α	TNF	234
VEGF	VEGFA	234
ADR	ADRA1A	1234
Akt	AKT	2
CoA	NCOA1	1234
c-SRC	SRC	3
EGFR	EGFR	234
ER	ESR1	1234
ERK1	MAPK1	234
GLP-1R	GLP1R	2
HRH	HRH3	2
INS	INS	34
INSR	INSR	234
IRS	IRS1	234
MEK	MAP2K1	2
PGR	PGR	1234
PGR	PGR	1234
PI3K	PI3K3CA	2
PTGER	PTGER3	34
PTHR	PTH1R	13
Raf	RAF1	23
TSHR	TSHR	23
		*1:Jun; 2.Chen; 3:Zuo; 4:Shi

## Sheet: Fig5_map
Fig5's reference map from KEGG
KEGG_map_id	KEGG_map_name
hsa04151	PI3K-Akt signaling pathway
hsa05163	hsa05163 Human cytomegalovirus infection
hsa05165	Human papillomavirus infection
hsa04933	AGE-RAGE signaling pathway in diabetic complications
hsa05166	Human T-cell leukemia virus 1 infection
hsa01522	Endocrine resistance
hsa05224	Breast cancer
hsa04915	Estrogen signaling pathway
